# Supplementary material for: A Disposable Screen Printed Electrodes with Hexagonal Ni(OH)2 Nanoplates Embedded Chitosan Layer for the Detection of Depression Biomarker
Source: MDPI journal article supplement (doi:10.3390/mi14010146), 2023-01-05
Supplement: s1 [file s1]

Supplementary Materials

# A Disposable Screen Printed Electrodes with Hexagonal Ni(OH)<sub>2</sub> Nanoplates Embedded Chitosan Layer for the Detection of Depression Biomarker

Satyanarayana Moru <sup>1,\*</sup>, Venishetty Sunil Kumar <sup>2</sup>, Shekar Kummari <sup>3</sup> and Kotagiri Yugender Goud <sup>3,4</sup>

<sup>1</sup> Department of Chemistry, School of Advanced Sciences, VIT-AP University, Amaravati 522237, India

<sup>2</sup> Department of Physical Sciences, Kakatiya Institute of Technology & Science, Warangal 506015, India

<sup>3</sup> Department of Chemistry, Indian Institute of Technology Palakkad, Palakkad 678 557, India

<sup>4</sup> Institute of Nanobiotechnology, Johns Hopkins University, Baltimore, MD 21218, USA

\* Correspondence: dr.morusatyanarayana@gmail.com or satyanarayana.moru@vitap.ac.in; Tel.: +91-9959704030

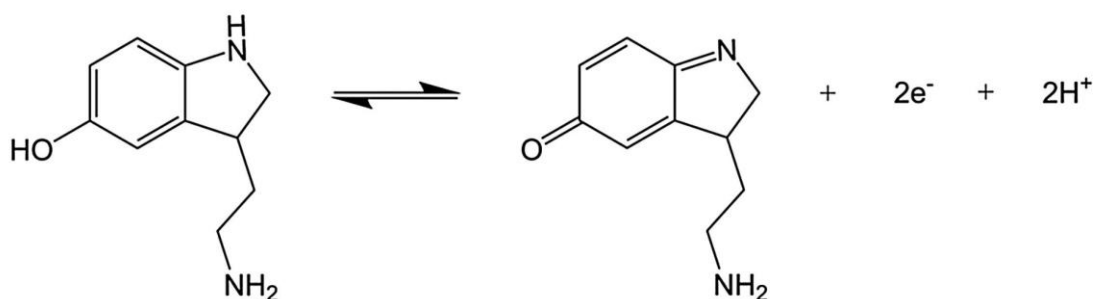

**Scheme 1.** Plausible electrochemical oxidation reaction mechanism of 5-HT.

**Table S1.** Composition of prepared artificial urine and saliva samples.

| Chemical component                   | Synthetic Urine<br>(g L <sup>-1</sup> ) | Synthetic Saliva<br>(g L <sup>-1</sup> ) |
|--------------------------------------|-----------------------------------------|------------------------------------------|
| CaCl <sub>2</sub> ·2H <sub>2</sub> O | 1.12                                    | 0.81                                     |
| NaCl                                 | 2.92                                    | 0.40                                     |
| Na <sub>2</sub> SO <sub>4</sub>      | 2.24                                    | —                                        |
| KH <sub>2</sub> PO <sub>4</sub>      | 1.40                                    | 0.78                                     |
| KCl                                  | 1.60                                    | 0.43                                     |
| NH <sub>4</sub> Cl                   | 1.00                                    | —                                        |
| Urea                                 | 25.0                                    | 1.00                                     |
| Creatinine                           | 1.10                                    | —                                        |

**Table S2.** Comparison of working concentration range and detection limit of 5-HT by NH-HNP-Chit/SPCE with recently reported methods.

| Electrode                       | Detection Method | Linear Range                    | Limit of detection        | Reference |
|---------------------------------|------------------|---------------------------------|---------------------------|-----------|
| MCM-41-COOH/Au@nano-CILPE       | SWV              | 0.2 – 20 μM                     | 0.1 μM                    | [S1]      |
| Pt/MWCNT/PPy/AgNPs              | DPV              | 0.50 – 5.0 μmol L <sup>-1</sup> | 0.15 μmol L <sup>-1</sup> | [S2]      |
| DDF-CNT-TiO <sub>2</sub> /IL/GC | DPV              | 1.0 – 650.0 μM                  | 0.154 μM                  | [S3]      |

|                                          |              |                                      |                          |           |
|------------------------------------------|--------------|--------------------------------------|--------------------------|-----------|
| GCE/MWCNT-NiO                            | SWV          |                                      | 118 nM                   |           |
| GCE/MWCNT-ZnO                            | SWV          | $5.98 \times 10^{-3}$ - 62.8 $\mu$ M | 129 nM                   | [S4]      |
| GCE/MWCNT-Fe <sub>3</sub> O <sub>4</sub> | SWV          |                                      | 166 nM                   |           |
| PEDOT:PSS/TPyP- 3IP/FTO                  | CV           | -                                    | 0.23 $\mu$ M             | [S5]      |
| NiO/CNT/PEDOT/GCE                        | DPV          | 0.3 – 35 $\mu$ M                     | 0.063 $\mu$ M            | [S6]      |
| MWCNT/GC                                 | DPV          | 5 – 210 $\mu$ M                      | 460 nmol L <sup>-1</sup> | [S7]      |
| IL-DC-CNT/GC                             | DPV          | 5.0 – 900.0 $\mu$ M                  | 2 $\mu$ M                | [S8]      |
| polymelamine/EPPGS                       | SWV          | 0.1 – 100 $\mu$ M                    | 30 nM                    | [S9]      |
| G-g-PLA-Pd/GCE                           | amperometric | 0.1–100.0 $\mu$ M                    | 0.08 $\mu$ M             | [S10]     |
| MWCNT-Chit/GCE                           | DPV          | 0.05–16 $\mu$ M                      | 50 nM                    | [S11]     |
| NH-HNP-Chit/SPCE                         | DPV          | 0.1 – 30 $\mu$ M                     | 60 nM                    | This work |

MCM-41-COOH-carboxyl-functionalized mesoporous molecular sieve; ILPE-ionic liquid paste electrode; MWCNT- multi-walled carbon nanotubes; PPy- polypyrrole; AgNPs- silver nanoparticles; DDF- 9-(1,3-dithiolan-2-yl)-6,7-dihydroxy-3,3-dimethyl-3,4-dihydrodibenzo[b,d]furan-1(2H)-one; IL- 1-butyl-3-methylimidazolium tetrafluoroborate; (TPyP)-tetrakis(4-pyridyl)-21H,23H-porphyrin; PEDOT-poly(3,4-ethylenedioxythiophene); IL-ionic liquid; EPPGS-edge plane pyrolytic graphite sensor; PLA- poly(lactic acid).

## References

- Li, Y.; Ji, Y.; Ren, B.; Jia, L.; Ma, G.; Liu, X. Carboxyl-functionalized mesoporous molecular sieve/colloidal gold modified nano-carbon ionic liquid paste electrode for electrochemical determination of serotonin. *Mater. Res. Bull.* **2019**, *109*, 240–245. <https://doi.org/10.1016/j.materresbull.2018.10.002>.
- Cesarino, I.; Galesco, H.V.; Machado, S.A. Determination of serotonin on platinum electrode modified with carbon nanotubes/polypyrrole/silver nanoparticles nanohybrid. *Mater. Sci. Eng. C* **2014**, *40*, 49–54. <https://doi.org/10.1016/j.msec.2014.03.030>.
- Mazloun-Ardakani, M.; Khoshroo, A. Electrocatalytic properties of functionalized carbon nanotubes with titanium dioxide and benzofuran derivative/ionic liquid for simultaneous determination of isoproterenol and serotonin. *Electrochim. Acta* **2014**, *130*, 634–641. <https://doi.org/10.1016/j.electacta.2014.03.063>.
- Fayemi, O.E.; Adekunle, A.S.; Ebinso, E.E. Electrochemical determination of serotonin in urine samples based on metal oxide nanoparticles/MWCNT on modified glassy carbon electrode. *Sens. Bio-Sens. Res.* **2017**, *13*, 17–27. <https://doi.org/10.1016/j.sbsr.2017.01.005>.
- Song, M.-J.; Kim, S.; Min, N.K.; Jin, J.-H. Electrochemical serotonin monitoring of poly(ethylenedioxythiophene):poly(sodium 4-styrenesulfonate)-modified fluorine-doped tin oxide by predeposition of self-assembled 4-pyridylporphyrin. *Biosens. Bioelectron.* **2014**, *52*, 411–416. <https://doi.org/10.1016/j.bios.2013.08.040>.
- Sun, D.; Li, H.; Li, M.; Li, C.; Dai, H.; Sun, D.; Yang, B. Electrodeposition synthesis of a NiO/CNT/PEDOT composite for simultaneous detection of dopamine, serotonin, and tryptophan. *Sensors Actuators B Chem.* **2018**, *259*, 433–442. <https://doi.org/10.1016/j.snb.2017.12.037>.
- Bonetto, M.C.; Muñoz, F.F.; Diz, V.E.; Sacco, N.J.; Cortón, E. Fused and unzipped carbon nanotubes, electrochemically treated, for selective determination of dopamine and serotonin. *Electrochim. Acta* **2018**, *283*, 338–348. <https://doi.org/10.1016/j.electacta.2018.06.179>.
- Mazloun-Ardakani, M.; Khoshroo, A. High sensitive sensor based on functionalized carbon nanotube/ionic liquid nanocomposite for simultaneous determination of norepinephrine and serotonin. *J. Electroanal. Chem.* **2014**, *717–718*, 17–23. <https://doi.org/10.1016/j.jelechem.2013.12.034>.
- Gupta, P.; Goyal, R.N. Polymelamine modified edge plane pyrolytic graphite sensor for the electrochemical assay of serotonin. *Talanta* **2014**, *120*, 17–22. <https://doi.org/10.1016/j.talanta.2013.11.075>.
- Han, H.S.; You, J.-M.; Jeong, H.; Jeon, S. Synthesis of graphene oxide grafted poly(lactic acid) with palladium nanoparticles and its application to serotonin sensing. *Appl. Surf. Sci.* **2013**, *284*, 438–445. <https://doi.org/10.1016/j.apsusc.2013.07.116>.
- Satyanarayana, M.; Koteswara Reddy, K.; Vengatajalabathy Gobi, K. Nanobiocomposite Based Electrochemical Sensor for Sensitive Determination of Serotonin in Presence of Dopamine, Ascorbic Acid and Uric Acid In Vitro. *Electroanalysis* **2014**, *26*, 2365–2372. <https://doi.org/10.1002/elan.201400243>
